# Supplementary material
Source: PubMed Central journal article supplement (PMC5083130)
Supplement: NIHMS796218-supplement-1.pdf [file NIHMS796218-supplement-1.pdf]

# Crystal Structure of SgcJ, An NTF2-Like Superfamily Protein Involved in Biosynthesis of the 9-Membered Eneidyne Antitumor Antibiotic C-1027

Tingting Huang<sup>1,†</sup>, Chin-Yuan Chang<sup>1</sup>, Jeremy R. Lohman<sup>1,‡</sup>, Jeffrey D. Rudolf<sup>1</sup>,  
Youngchang Kim<sup>2,3,4</sup>, Changsoo Chang<sup>3,4</sup>, Dong Yang<sup>1</sup>, Ming Ma<sup>1</sup>, Xiaohui Yan<sup>1</sup>, Ivana  
Crnovcic<sup>1</sup>, Lance Bigelow<sup>4</sup>, Shonda Clancy<sup>4</sup>, Craig A. Bingman<sup>5</sup>, Ragothaman M.  
Yenamalli<sup>6,§</sup>, Gyorgy Babnigg<sup>2,4</sup>, Andrzej Joachimiak<sup>2,3,4</sup>, George N. Phillips, Jr.<sup>6</sup> and Ben  
Shen<sup>1,7,8\*</sup>

<sup>1</sup>Department of Chemistry, The Scripps Research Institute, Jupiter, FL 33458, United States;

<sup>2</sup>Center for Structural Genomics of Infectious Diseases, University of Chicago, Chicago, IL

60637, United States; <sup>3</sup>Structural Biology Center and <sup>4</sup>Midwest Center for Structural

Genomics, Biosciences Division, Argonne National Laboratory, Argonne, IL 60439, United

States; <sup>5</sup>Department of Biochemistry, University Wisconsin-Madison, Madison, WI 53705,

United States; <sup>6</sup>BioSciences at Rice and Department of Chemistry, Rice University, Houston,

TX 77251, United States; and <sup>7</sup>Department of Molecular Therapeutics and <sup>8</sup>Natural Products

Library Initiative at The Scripps Research Institute, The Scripps Research Institute, Jupiter,

FL 33458, United States

\*Correspondence to: E-mail: [shenb@scripps.edu](mailto:shenb@scripps.edu), Tel: (561) 228-2456; Fax: (561) 228-2472

## Supplementary Information

|                                                                                                       |     |
|-------------------------------------------------------------------------------------------------------|-----|
| <b>Table S1.</b> Bacterial strains used in this study                                                 | S2  |
| <b>Table S2.</b> Plasmids and cosmids used in this study                                              | S3  |
| <b>Table S3.</b> Primers used in this study                                                           | S4  |
| <b>Figure S1.</b> Structures of the six known 10-membered enediynes                                   | S5  |
| <b>Figure S2.</b> Multiple sequence alignment of SgcJ and its homologues.                             | S6  |
| <b>Figure S3.</b> Construction of the $\Delta$ <i>sgcJ</i> mutant strain <i>S. globisporus</i> SB1027 | S9  |
| <b>Figure S4.</b> Size exclusion chromatography of SgcJ and NCS-Orf16                                 | S10 |
| <b>References</b>                                                                                     | S11 |

**Table 1.** Bacterial strains used in this study

| Strain                                 | Description                                                                      | Source (Reference) |
|----------------------------------------|----------------------------------------------------------------------------------|--------------------|
| <b><i>Streptomyces globisporus</i></b> |                                                                                  |                    |
| SB1022                                 | <i>S. globisporus</i> $\Delta$ <i>sgcR1</i> mutant strain                        | 1                  |
| SB1027                                 | <i>S. globisporus</i> $\Delta$ <i>sgcR1</i> / $\Delta$ <i>sgcJ</i> mutant strain | This work          |
| SB1028                                 | $\Delta$ <i>sgcJ</i> mutant complemented by pBS1146                              | This work          |
| SB1029                                 | $\Delta$ <i>sgcJ</i> mutant complemented by pBS1147                              | This work          |
| SB1030                                 | $\Delta$ <i>sgcJ</i> mutant complemented by pBS1148                              | This work          |
| SB1031                                 | $\Delta$ <i>sgcJ</i> mutant complemented by pBS1149                              | This work          |
| SB1032                                 | $\Delta$ <i>sgcJ</i> mutant complemented by pBS1150                              | This work          |
| SB1033                                 | $\Delta$ <i>sgcJ</i> mutant complemented by pBS1151                              | This work          |
| SB1034                                 | $\Delta$ <i>sgcJ</i> mutant complemented by pBS1152                              | This work          |
| SB1035                                 | $\Delta$ <i>sgcJ</i> mutant complemented by pBS1153                              | This work          |
| <b><i>Escherichia coli</i></b>         |                                                                                  |                    |
| <i>E. coli</i> DH5 $\alpha$            | General subcloning host                                                          | commercial         |
| <i>E. coli</i> BR513                   | Bioassay test strain for BIA                                                     | 2                  |
| <b><i>Micrococcus luteus</i></b>       |                                                                                  |                    |
| <i>M. luteus</i> ATCC 9431             | Test strain for testing of the antibacterial activity of C-1027                  | ATCC               |

**Table S2.** Plasmids and cosmids used in this study

| Plasmid                | Description                                                                                        | Source (Reference) |
|------------------------|----------------------------------------------------------------------------------------------------|--------------------|
| pSET152                | Integrative <i>Streptomyces</i> vector                                                             | commercial         |
| pSET151                | Integrative <i>Streptomyces</i> vector                                                             | commercial         |
| pJTU4659               | Vector containing kanamycin ( <i>kan</i> ) resistance cassette                                     | This work          |
| pUWL201pw              | <i>E. coli-Streptomyces</i> expression shuttle vector                                              | 3                  |
| pBS1005                | Cosmid containing partial <i>C-1027</i> gene cluster                                               | 4                  |
| pBS5007                | Cosmid containing partial <i>ncs</i> gene cluster                                                  | 5                  |
| pMCSG57                | <i>E. coli</i> expression vector                                                                   | 6                  |
| pBS1143                | pBS1005 in which <i>sgcJ</i> has been inactivated by inserting a kanamycin ( <i>kan</i> ) cassette | This work          |
| pBS1144                | pSET151 harboring <i>kan</i> cassette (cloned into the <i>XbaI</i> site)                           | This work          |
| pBS1145                | pUWL201pw with <i>oriT</i> fragment inserted into the <i>KpnI</i> site                             | This work          |
| pBS1146                | pBS1145 harboring <i>sgcJ</i> gene (cloned into the <i>NdeI</i> and <i>EcoRI</i> sites)            | This work          |
| pBS1147                | pBS1145 harboring <i>ncs-orf16</i> gene (cloned into the <i>NdeI</i> and <i>HindIII</i> sites)     | This work          |
| pBS1148                | SgcJ mutant (W29A) generated by site-directed mutagenesis of pBS1146                               | This work          |
| pBS1149                | SgcJ mutant (F37A) generated by site-directed mutagenesis of pBS1146                               | This work          |
| pBS1150                | SgcJ mutant (Y72A) generated by site-directed mutagenesis of pBS1146                               | This work          |
| pBS1151                | SgcJ mutant (D111A) generated by site-directed mutagenesis of pBS1146                              | This work          |
| pBS1152                | SgcJ mutant (W118A) generated by site-directed mutagenesis of pBS1146                              | This work          |
| pBS1153                | SgcJ mutant (Y132A) generated by site-directed mutagenesis of pBS1146                              | This work          |
| pBS1154<br>(APC109082) | pMCSG57 containing <i>sgcJ</i> gene for protein expression                                         | This work          |
| pBS1155<br>(APC109139) | pMCSG57 containing <i>ncs-orf16</i> gene for protein expression                                    | This work          |

**Table S3.** Primers used in this study

| Primer        | Nucleotide Sequence                                                    | Function                                        |
|---------------|------------------------------------------------------------------------|-------------------------------------------------|
| sgcJtgtF      | 5'-ATGACCAGCACCGACTCGACCACCTCCGCTCCCGACGCCG<br>ATTCCGGGGATCCGTCGACC-3' | PCR targeting for<br>replacement of <i>sgcJ</i> |
| sgcJtgtR      | 5'-TCAGTCGTTGCCGCGCGGGCTGTTCTGGTAAGCGGCCAGA<br>CTGTAGGCTGGAGCTGCTTC-3' | PCR targeting for<br>replacement of <i>sgcJ</i> |
| oriT152F      | 5'-CGGGTACCAGTATGCAGGTGCAGCGGATCT-3' ( <i>KpnI</i> )                   | <i>oriT</i> amplification                       |
| oriT152R      | 5'-CCGGTACCCTTGCTCGTCGGTGATGTAC-3' ( <i>KpnI</i> )                     | <i>oriT</i> amplification                       |
| sgcJ201NdeIF  | 5'-GCAATTCATATGACCAGCACCGACTCGA-3' ( <i>NdeI</i> )                     | <i>sgcJ</i> amplification                       |
| sgcJ201EcoRIR | 5'-GGAATTCAGTCGTTGCCGCGCGG-3' ( <i>EcoRI</i> )                         | <i>sgcJ</i> amplification                       |
| ncs16NdeIF    | 5'-GCAATTCATATGGGAGTGAAGATGAGTTC-3' ( <i>NdeI</i> )                    | <i>ncs-orf16</i> amplification                  |
| ncs16HindIIIR | 5'-CCCAAGCTTTGATGGCAGACGGACGGG-3' ( <i>HindIII</i> )                   | <i>ncs-orf16</i> amplification                  |
| sgcJW29A-F    | 5'-ATCGTGGCCGCCGCGGCCGACCACGACGCCGAC-3'                                | Site-directed mutagenesis<br>for W29A of SgcJ   |
| sgcJW29A-R    | 5'-GTCGTGGTCGGCCGCGGCCACGATGCGCGC-3'                                   | Site-directed mutagenesis<br>for W29A of SgcJ   |
| sgcJF37A-F    | 5'-GACGCCGACCGGCCGCCGACGTCTTCGCCGAG-3'                                 | Site-directed mutagenesis<br>for F37A of SgcJ   |
| sgcJF37A-R    | 5'-GAAGACGTCGGCGGCCCGGTCGGCGTCGTGGTC-3'                                | Site-directed mutagenesis<br>for F37A of SgcJ   |
| sgcJY72A-F    | 5'-TTCGCGGGCCCGCCAAGGGCACCCGTGTCATC-3'                                 | Site-directed mutagenesis<br>for Y72A of SgcJ   |
| sgcJY72A-R    | 5'-ACGGGTGCCCTTGCCGGGCCCGCAAGGCGGC-3'                                  | Site-directed mutagenesis<br>for Y72A of SgcJ   |
| sgcJD111A-F   | 5'-GAGGCGAGCGCGCCGGCGCCGTCCGGGCCTCC-3'                                 | Site-directed mutagenesis<br>for D111A of SgcJ  |
| sgcJD111A-R   | 5'-CCGGACGGCGCCGGCGCCGCTCGCCTCGGTCTC-3'                                | Site-directed mutagenesis<br>for D111A of SgcJ  |
| sgcJW118A-F   | 5'-GTCCGGGCCTCCGCGCTGGCCGTCGAACAGGAC-3'                                | Site-directed mutagenesis<br>for W118A of SgcJ  |
| sgcJW118A-R   | 5'-TTCGACGGCCAGCGCGGAGGCCCGGACGGCGCC-3'                                | Site-directed mutagenesis<br>for W118A of SgcJ  |
| sgcJY132A-F   | 5'-CGTCTGGCCGCTGCCAGAACAGCCCGCGCGGC-3'                                 | Site-directed mutagenesis<br>for Y132A of SgcJ  |
| sgcJY132A-R   | 5'-CGGGCTGTTCTGGGCAGCGGCCAGACGCCACTG-3'                                | Site-directed mutagenesis<br>for Y132A of SgcJ  |
| sgcJ-F        | 5'-TACTTCCAATCCAATGCCATGACCAGCACCGACTCGACC-3'                          | <i>sgcJ</i> amplification                       |
| sgcJ-R        | 5'-TTATCCACTTCCAATGTTAGTCGTTGCCGCGCGGG-3'                              | <i>sgcJ</i> amplification                       |
| ncs-orf16-F   | 5'-TACTTCCAATCCAATGCCATGGGAGTGAAGATGAGTTCTG<br>GC-3'                   | <i>ncs-orf16</i> amplification                  |
| ncs-orf16-R   | 5'-TTATCCACTTCCAATGTTATGGCAGACGGACGGGGCT-3'                            | <i>ncs-orf16</i> amplification                  |
| sgcJidF       | 5'-ATGACCAGCACCGACTCGA-3'                                              | PCR check of SB1027                             |
| sgcJidR       | 5'-GCTTACCAGAACAGCCCGC-3'                                              | PCR check of SB1027                             |
| sgcJ-Sprobe-F | 5'-TCCGTTGGTTGGCGGTTTC-3'                                              | Southern hybridization for<br>SB1027            |
| sgcJ-Sprobe-R | 5'-CGATGTGCTCGTAGGTGGG-3'                                              | Southern hybridization for<br>SB1027            |

**Figure S1.** Structures of the six known 10-membered enediyne natural products with their enediyne core highlighted in red. Given in parentheses are the years when each of the enediyne structures was established.

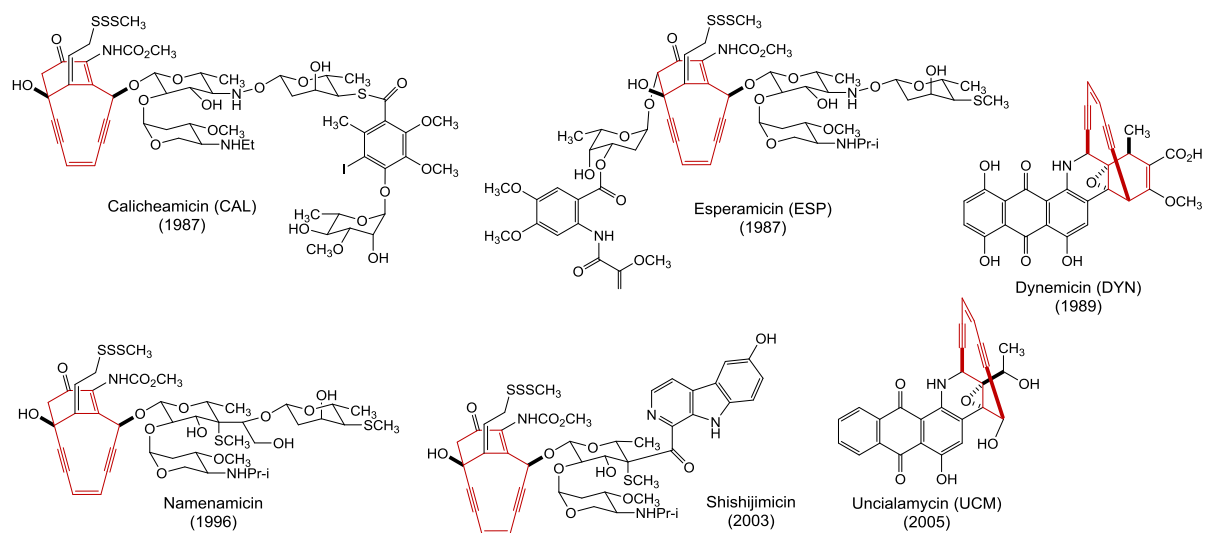

**Figure S2.** Sequence analysis of SgcJ and its homologues from the seven known and 34 putative 9-membered enediyne biosynthetic gene clusters (given in parenthesis are accession numbers). (a) Phylogenetic analysis of SgcJ and its homologues. The phylogenetic tree was constructed with neighbor-joining method. Numbers of each node indicated the percentage of bootstrapping of a 1000 replications. The scale bar indicates branch length. (b) Multiple sequence alignment of SgcJ and its homologues. Aligned residues are colored on the basis of the level of conservation (red background with white character shows strict identity, red character similarity and blue frame similarity across groups).

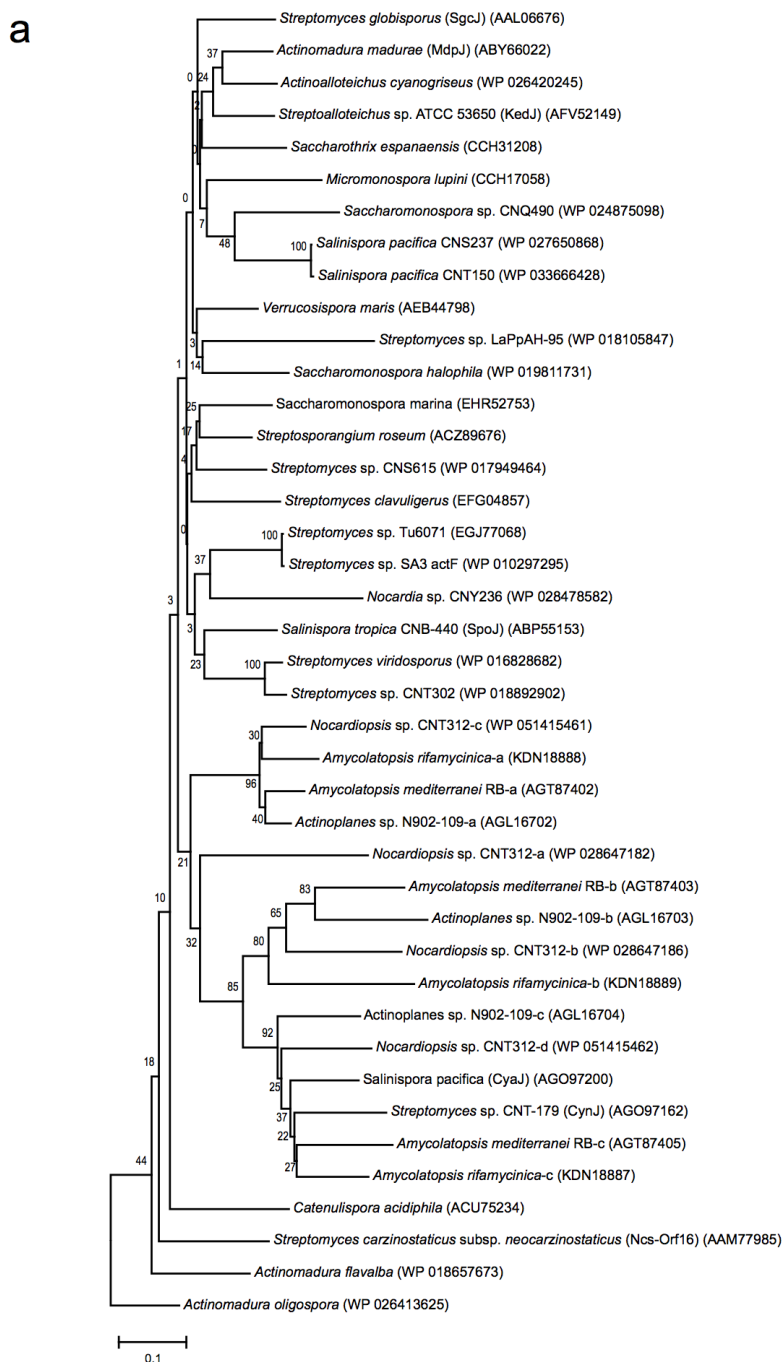

b

|                                                                                             |   |       | TT    | α1    | α2    | α3    |
|---------------------------------------------------------------------------------------------|---|-------|-------|-------|-------|-------|
| <i>Streptomyces globisporus</i> (SgcJ) (AAL06676)                                           | 1 | ..... | ..... | ..... | ..... | ..... |
| <i>Streptomyces globisporus</i> (SgcJ) (AAL06676)                                           | 1 | ..... | ..... | ..... | ..... | ..... |
| <i>Actinonadura madurae</i> (MdpJ) (ABY66022)                                               | 1 | ..... | ..... | ..... | ..... | ..... |
| <i>Actinonadurella cyanogriseus</i> (WP 026420245)                                          | 1 | ..... | ..... | ..... | ..... | ..... |
| <i>Streptoactinotrichus</i> sp. ATCC 53650 (KedJ) (AFV52149)                                | 1 | ..... | ..... | ..... | ..... | ..... |
| <i>Saccharothrix espanaensis</i> (CCH31208)                                                 | 1 | ..... | ..... | ..... | ..... | ..... |
| <i>Micromonospora lupini</i> (CCH17058)                                                     | 1 | ..... | ..... | ..... | ..... | ..... |
| <i>Saccharomonospora</i> sp. CNQ490 (WP 024875098)                                          | 1 | ..... | ..... | ..... | ..... | ..... |
| <i>Salinispora pacifica</i> CNS237 (WP 027650868)                                           | 1 | ..... | ..... | ..... | ..... | ..... |
| <i>Salinispora pacifica</i> CNT150 (WP 033666428)                                           | 1 | ..... | ..... | ..... | ..... | ..... |
| <i>Verrucosipora maris</i> (AEB44798)                                                       | 1 | ..... | ..... | ..... | ..... | ..... |
| <i>Streptomyces</i> sp. LaPaAH-95 (WP 018105847)                                            | 1 | ..... | ..... | ..... | ..... | ..... |
| <i>Saccharomonospora halophila</i> (WP 019811731)                                           | 1 | ..... | ..... | ..... | ..... | ..... |
| <i>Saccharomonospora marina</i> (EHR52753)                                                  | 1 | ..... | ..... | ..... | ..... | ..... |
| <i>Streptosporangium roseum</i> (ACZ89676)                                                  | 1 | ..... | ..... | ..... | ..... | ..... |
| <i>Streptomyces</i> sp. CNS615 (WP 017949464)                                               | 1 | ..... | ..... | ..... | ..... | ..... |
| <i>Streptomyces clavuligerus</i> (EFG04857)                                                 | 1 | ..... | ..... | ..... | ..... | ..... |
| <i>Streptomyces</i> sp. Tu6071 (EGJ77068)                                                   | 1 | ..... | ..... | ..... | ..... | ..... |
| <i>Streptomyces</i> sp. SA3 actf (WP 010297295)                                             | 1 | ..... | ..... | ..... | ..... | ..... |
| <i>Nocardia</i> sp. CNY236 (WP 028478582)                                                   | 1 | ..... | ..... | ..... | ..... | ..... |
| <i>Salinispora tropica</i> CNB-440 (SpoJ) (ABP55153)                                        | 1 | ..... | ..... | ..... | ..... | ..... |
| <i>Streptomyces viridosporus</i> (WP 016828682)                                             | 1 | ..... | ..... | ..... | ..... | ..... |
| <i>Streptomyces</i> sp. CNT302 (WP 018892902)                                               | 1 | ..... | ..... | ..... | ..... | ..... |
| <i>Nocardiosis</i> sp. CNT312-c (WP 051415461)                                              | 1 | ..... | ..... | ..... | ..... | ..... |
| <i>Amycolatopsis rifamycinica</i> -a (KDN18888)                                             | 1 | ..... | ..... | ..... | ..... | ..... |
| <i>Amycolatopsis mediterranei</i> RB-a (AGT87402)                                           | 1 | ..... | ..... | ..... | ..... | ..... |
| <i>Actinoplanes</i> sp. N902-109-a (AGL16703)                                               | 1 | ..... | ..... | ..... | ..... | ..... |
| <i>Nocardiosis</i> sp. CNT312-a (WP 028647182)                                              | 1 | ..... | ..... | ..... | ..... | ..... |
| <i>Amycolatopsis mediterranei</i> RB-b (AGT87403)                                           | 1 | ..... | ..... | ..... | ..... | ..... |
| <i>Actinoplanes</i> sp. N902-109-b (AGL16703)                                               | 1 | ..... | ..... | ..... | ..... | ..... |
| <i>Nocardiosis</i> sp. CNT312-b (WP 028647186)                                              | 1 | ..... | ..... | ..... | ..... | ..... |
| <i>Amycolatopsis rifamycinica</i> -b (KDN18889)                                             | 1 | ..... | ..... | ..... | ..... | ..... |
| <i>Actinoplanes</i> sp. N902-109-c (AGL16704)                                               | 1 | ..... | ..... | ..... | ..... | ..... |
| <i>Nocardiosis</i> sp. CNT312-d (WP 051415462)                                              | 1 | ..... | ..... | ..... | ..... | ..... |
| <i>Salinispora pacifica</i> (CysJ) (AGO97200)                                               | 1 | ..... | ..... | ..... | ..... | ..... |
| <i>Nocardiosis</i> sp. CNT-179 (CynJ) (AGO97162)                                            | 1 | ..... | ..... | ..... | ..... | ..... |
| <i>Amycolatopsis mediterranei</i> RB-c (AGT87405)                                           | 1 | ..... | ..... | ..... | ..... | ..... |
| <i>Amycolatopsis rifamycinica</i> -c (KDN18887)                                             | 1 | ..... | ..... | ..... | ..... | ..... |
| <i>Catenulispora acidiphila</i> (ACU75234)                                                  | 1 | ..... | ..... | ..... | ..... | ..... |
| <i>Streptomyces carzinostaticus</i> subsp. <i>neocarzinostaticus</i> (Ncs-Orf16) (AAM77985) | 1 | ..... | ..... | ..... | ..... | ..... |
| <i>Actinonadura flavaiba</i> (WP 018657673)                                                 | 1 | ..... | ..... | ..... | ..... | ..... |
| <i>Actinonadura oligospora</i> (WP 026413625)                                               | 1 | ..... | ..... | ..... | ..... | ..... |

|                                                                                             |    | α4                | β3                                      | TT | β4       |
|---------------------------------------------------------------------------------------------|----|-------------------|-----------------------------------------|----|----------|
| <i>Streptomyces globisporus</i> (SgcJ) (AAL06676)                                           | 37 | FADVFEDDGTMLLPG   | LFRKGRNERTTHMAAFAGSYKGRVIGSTFDARLIGDG   | .. | IALLITIG |
| <i>Actinonadura madurae</i> (MdpJ) (ABY66022)                                               | 36 | FAGVFIDDDGTMLLPG  | VYRKRGRDERTAYMDAFAAGSYKGRVIGSTFDARLIGDG | .. | TALLITIQ |
| <i>Actinonadurella cyanogriseus</i> (WP 026420245)                                          | 35 | FADVFEDDGTMLLPG   | IYRKRGRDERTAYMDAFAAGSYKGRVIGSTFDARLIGDG | .. | TALLITIQ |
| <i>Streptoactinotrichus</i> sp. ATCC 53650 (KedJ) (AFV52149)                                | 37 | FAGVFIDDDGTMLLPG  | VYRKRGRDERTAYMDAFAAGSYKGRVIGSTFDARLIGDG | .. | SGVLLITQ |
| <i>Saccharothrix espanaensis</i> (CCH31208)                                                 | 40 | IADLFTEDDGTMLLPG  | LYRKRGRDERTAYMDAFAAGSYKGRVIGSTFDARLIGDG | .. | FGILVITQ |
| <i>Micromonospora lupini</i> (CCH17058)                                                     | 37 | FADLFAEDDGTMLLPG  | VYVYRGRDERTAYMDAFAAGSYKGRVIGSTFDARLIGDG | .. | AVALLITQ |
| <i>Saccharomonospora</i> sp. CNQ490 (WP 024875098)                                          | 33 | FADLFAEDDGTMLLPG  | VYVYRGRDERTAYMDAFAAGSYKGRVIGSTFDARLIGDG | .. | VVVLLITQ |
| <i>Salinispora pacifica</i> CNS237 (WP 027650868)                                           | 37 | FADLFAEDDGTMLLPG  | IYRKRGRDERTAYMDAFAAGSYKGRVIGSTFDARLIGDG | .. | AAILLSYQ |
| <i>Salinispora pacifica</i> CNT150 (WP 033666428)                                           | 37 | FADLFAEDDGTMLLPG  | IYRKRGRDERTAYMDAFAAGSYKGRVIGSTFDARLIGDG | .. | AAILLSYQ |
| <i>Verrucosipora maris</i> (AEB44798)                                                       | 37 | FADLFAEDDGTMLLPG  | VYRKRGRDERTAYMDAFAAGSYKGRVIGSTFDARLIGDG | .. | FALLITIG |
| <i>Streptomyces</i> sp. LaPaAH-95 (WP 018105847)                                            | 40 | FADLFAEDDGTMLLPG  | AALKRGRDERTAYMDAFAAGSYKGRVIGSTFDARLIGDG | .. | VVLLITQ  |
| <i>Saccharomonospora halophila</i> (WP 019811731)                                           | 42 | FADLFAEDDGTMLLPG  | VYRKRGRDERTAYMDAFAAGSYKGRVIGSTFDARLIGDG | .. | TAVVITQ  |
| <i>Saccharomonospora marina</i> (EHR52753)                                                  | 40 | FADLFAEDDGTMLLPG  | VYRKRGRDERTAYMDAFAAGSYKGRVIGSTFDARLIGDG | .. | SAVLLITQ |
| <i>Streptosporangium roseum</i> (ACZ89676)                                                  | 40 | FADLFAEDDGTMLLPG  | VYRKRGRDERTAYMDAFAAGSYKGRVIGSTFDARLIGDG | .. | AVGLITQ  |
| <i>Streptomyces</i> sp. CNS615 (WP 017949464)                                               | 39 | FADLFAEDDGTMLLPG  | VYRKRGRDERTAYMDAFAAGSYKGRVIGSTFDARLIGDG | .. | SGILLITQ |
| <i>Streptomyces clavuligerus</i> (EFG04857)                                                 | 35 | FADLFAEDDGTMLLPG  | VYRKRGRDERTAYMDAFAAGSYKGRVIGSTFDARLIGDG | .. | SALLITIG |
| <i>Streptomyces</i> sp. Tu6071 (EGJ77068)                                                   | 34 | FADLFAEDDGTMLLPG  | VYRKRGRDERTAYMDAFAAGSYKGRVIGSTFDARLIGDG | .. | SAVLLITQ |
| <i>Streptomyces</i> sp. SA3 actf (WP 010297295)                                             | 34 | FADLFAEDDGTMLLPG  | VYRKRGRDERTAYMDAFAAGSYKGRVIGSTFDARLIGDG | .. | SAILVITQ |
| <i>Nocardia</i> sp. CNY236 (WP 028478582)                                                   | 26 | FADLFAEDDGTMLLPG  | VYRKRGRDERTAYMDAFAAGSYKGRVIGSTFDARLIGDG | .. | VVLLITQ  |
| <i>Salinispora tropica</i> CNB-440 (SpoJ) (ABP55153)                                        | 36 | FADLFAEDDGTMLLPG  | VYRKRGRDERTAYMDAFAAGSYKGRVIGSTFDARLIGDG | .. | TVLLITQ  |
| <i>Streptomyces viridosporus</i> (WP 016828682)                                             | 38 | FADLFAEDDGTMLLPG  | VYRKRGRDERTAYMDAFAAGSYKGRVIGSTFDARLIGDG | .. | TAVVITQ  |
| <i>Streptomyces</i> sp. CNT302 (WP 018892902)                                               | 42 | FADLFAEDDGTMLLPG  | VYRKRGRDERTAYMDAFAAGSYKGRVIGSTFDARLIGDG | .. | AVVITQ   |
| <i>Nocardiosis</i> sp. CNT312-c (WP 051415461)                                              | 50 | VADLFAEDDGTMLLPG  | VYRKRGRDERTAYMDAFAAGSYKGRVIGSTFDARLIGDG | .. | VCLVITQ  |
| <i>Amycolatopsis rifamycinica</i> -a (KDN18888)                                             | 35 | VAKAFVIEDDGTMLLPG | VYRKRGRDERTAYMDAFAAGSYKGRVIGSTFDARLIGDG | .. | VALIRITQ |
| <i>Amycolatopsis mediterranei</i> RB-a (AGT87402)                                           | 43 | VAKAFVIEDDGTMLLPG | VYRKRGRDERTAYMDAFAAGSYKGRVIGSTFDARLIGDG | .. | VALLITQ  |
| <i>Actinoplanes</i> sp. N902-109-a (AGL16703)                                               | 50 | VAGVFIEDDGTMLLPG  | VYRKRGRDERTAYMDAFAAGSYKGRVIGSTFDARLIGDG | .. | VALIRITQ |
| <i>Nocardiosis</i> sp. CNT312-a (WP 028647182)                                              | 33 | FADLFAEDDGTMLLPG  | VYRKRGRDERTAYMDAFAAGSYKGRVIGSTFDARLIGDG | .. | VVLLITQ  |
| <i>Amycolatopsis mediterranei</i> RB-b (AGT87403)                                           | 49 | LADLFAEDDGTMLLPG  | VYRKRGRDERTAYMDAFAAGSYKGRVIGSTFDARLIGDG | .. | IADVITQ  |
| <i>Actinoplanes</i> sp. N902-109-b (AGL16703)                                               | 48 | LADLFAEDDGTMLLPG  | VYRKRGRDERTAYMDAFAAGSYKGRVIGSTFDARLIGDG | .. | IADVITQ  |
| <i>Nocardiosis</i> sp. CNT312-b (WP 028647186)                                              | 49 | LADLFAEDDGTMLLPG  | VYRKRGRDERTAYMDAFAAGSYKGRVIGSTFDARLIGDG | .. | IADVITQ  |
| <i>Amycolatopsis rifamycinica</i> -b (KDN18889)                                             | 49 | FADLFAEDDGTMLLPG  | VYRKRGRDERTAYMDAFAAGSYKGRVIGSTFDARLIGDG | .. | IVVLLITQ |
| <i>Actinoplanes</i> sp. N902-109-c (AGL16704)                                               | 54 | FAGVFIEDDGTMLLPG  | VYRKRGRDERTAYMDAFAAGSYKGRVIGSTFDARLIGDG | .. | VAMVITQ  |
| <i>Nocardiosis</i> sp. CNT312-d (WP 051415462)                                              | 66 | FAGVFIEDDGTMLLPG  | VYRKRGRDERTAYMDAFAAGSYKGRVIGSTFDARLIGDG | .. | VAMVITQ  |
| <i>Salinispora pacifica</i> (CysJ) (AGO97200)                                               | 57 | FADLFAEDDGTMLLPG  | VYRKRGRDERTAYMDAFAAGSYKGRVIGSTFDARLIGDG | .. | VVLLITQ  |
| <i>Streptomyces</i> sp. CNT-179 (CynJ) (AGO97162)                                           | 53 | FADLFAEDDGTMLLPG  | VYRKRGRDERTAYMDAFAAGSYKGRVIGSTFDARLIGDG | .. | VAMVITQ  |
| <i>Amycolatopsis mediterranei</i> RB-c (AGT87405)                                           | 54 | FADLFAEDDGTMLLPG  | VYRKRGRDERTAYMDAFAAGSYKGRVIGSTFDARLIGDG | .. | TAMVITQ  |
| <i>Amycolatopsis rifamycinica</i> -c (KDN18887)                                             | 55 | FADLFAEDDGTMLLPG  | VYRKRGRDERTAYMDAFAAGSYKGRVIGSTFDARLIGDG | .. | VAMVITQ  |
| <i>Catenulispora acidiphila</i> (ACU75234)                                                  | 34 | FADLFAEDDGTMLLPG  | VYRKRGRDERTAYMDAFAAGSYKGRVIGSTFDARLIGDG | .. | FAMVITQ  |
| <i>Streptomyces carzinostaticus</i> subsp. <i>neocarzinostaticus</i> (Ncs-Orf16) (AAM77985) | 40 | FAGLFAEDDGTMLLPG  | VYRKRGRDERTAYMDAFAAGSYKGRVIGSTFDARLIGDG | .. | TAILITQ  |
| <i>Actinonadura flavaiba</i> (WP 018657673)                                                 | 34 | FAGLFAEDDGTMLLPG  | VYRKRGRDERTAYMDAFAAGSYKGRVIGSTFDARLIGDG | .. | TAMVITQ  |
| <i>Actinonadura oligospora</i> (WP 026413625)                                               | 27 | FADLFAEDDGTMLLPG  | VYRKRGRDERTAYMDAFAAGSYKGRVIGSTFDARLIGDG | .. | AVVLLITQ |

b (continued)

|                                                                                             |     | → | T | T |   | η1 | β5 |   | T | T |   | β6 |   |   |   |
|---------------------------------------------------------------------------------------------|-----|---|---|---|---|----|----|---|---|---|---|----|---|---|---|
|                                                                                             |     |   |   |   |   | Q  | Q  |   |   |   |   |    |   |   |   |
| <i>Streptomyces globisporus</i> (SgcJ) (AAL06676)                                           |     |   | G | I | L | A  | P  | G | E | T | E | A  | S | G | E |
| <i>Streptomyces globisporus</i> (SgcJ) (AAL06676)                                           | 99  |   | G | I | L | A  | P  | G | E | T | E | A  | S | G | E |
| <i>Actinomadura madurae</i> (MdpJ) (ABY66022)                                               | 98  |   | G | V | L | A  | N  | G | E | S | E | V  | S | D | E |
| <i>Actinoalloteichus cyanogriseus</i> (WP 026420245)                                        | 97  |   | G | V | L | A  | E  | G | E | S | E | V  | S | D | E |
| <i>Streptoalloteichus</i> sp. ATCC 53650 (KedJ) (AFV52149)                                  | 99  |   | G | V | L | K  | P  | G | T | T | E | V  | T | E | S |
| <i>Saccharothrix espanaensis</i> (CCH31208)                                                 | 102 |   | G | V | L | A  | P  | G | D | T | E | V  | T | A | E |
| <i>Micromonospora lupini</i> (CCH17058)                                                     | 99  |   | G | V | I | A  | A  | G | S | T | E | L  | A | A | D |
| <i>Saccharomonospora</i> sp. CNQ490 (WP 024875098)                                          | 95  |   | G | V | M | E  | E  | G | Q | T | E | V  | S | P | E |
| <i>Salinispora pacifica</i> CNS237 (WP 027650868)                                           | 99  |   | G | V | L | E  | S  | G | E | S | E | V  | S | S | K |
| <i>Salinispora pacifica</i> CNT150 (WP 033666428)                                           | 99  |   | G | V | L | E  | S  | G | E | S | E | V  | S | S | K |
| <i>Verrucosipora maris</i> (AEB44798)                                                       | 99  |   | G | V | L | A  | P  | G | E | T | E | V  | A | A | E |
| <i>Streptomyces</i> sp. LaPpAH-95 (WP 018105847)                                            | 104 |   | G | A | Y | P  | P  | D | A | T | E | V  | P | T | E |
| <i>Saccharomonospora halophila</i> (WP 019811731)                                           | 104 |   | G | V | L | T  | P  | G | E | T | E | P  | A | A | E |
| <i>Saccharomonospora marina</i> (EHR52753)                                                  | 102 |   | G | I | L | A  | P  | G | E | T | E | V  | S | D | E |
| <i>Streptosporangium roseum</i> (ACZ89676)                                                  | 102 |   | G | V | L | A  | P  | G | E | T | E | V  | S | D | E |
| <i>Streptomyces</i> sp. CNS615 (WP 017949464)                                               | 101 |   | G | I | L | A  | P  | G | E | S | E | P  | S | A | D |
| <i>Streptomyces clavuligerus</i> (EFG04857)                                                 | 97  |   | G | V | L | E  | G  | E | E | V | A | A  | E | R | A |
| <i>Streptomyces</i> sp. Tu6071 (EGJ77068)                                                   | 96  |   | G | V | L | L  | P  | G | E | K | K | V  | S | A | E |
| <i>Streptomyces</i> sp. SA3 actF (WP 010297295)                                             | 96  |   | G | V | L | L  | P  | G | E | K | K | V  | S | A | E |
| <i>Nocardia</i> sp. CNY236 (WP 028478582)                                                   | 88  |   | G | I | R | P  | T  | A | D | S | L | P  | D | G | A |
| <i>Salinispora tropica</i> CNB-440 (SpoJ) (ABP55153)                                        | 98  |   | G | V | L | A  | P  | G | E | T | E | P  | A | A | E |
| <i>Streptomyces viridosporus</i> (WP 016828682)                                             | 100 |   | G | V | L | A  | P  | G | E | S | E | P  | A | A | E |
| <i>Streptomyces</i> sp. CNT302 (WP 018892902)                                               | 104 |   | G | V | L | T  | P  | G | E | T | E | P  | A | A | E |
| <i>Nocardopsis</i> sp. CNT312-c (WP 051415461)                                              | 113 |   | G | I | L | A  | P  | G | E | T | E | I  | A | P | E |
| <i>Amycolatopsis rifamycinica</i> -a (KDN18888)                                             | 98  |   | G | I | L | A  | P  | G | E | T | E | I  | D | E | L |
| <i>Amycolatopsis mediterranei</i> RB-a (AGT87402)                                           | 106 |   | G | I | L | A  | A  | G | E | T | E | I  | D | E | L |
| <i>Actinoplanes</i> sp. N902-109-a (AGL16702)                                               | 113 |   | G | I | L | A  | P  | G | Q | T | E | I  | E | P | E |
| <i>Nocardopsis</i> sp. CNT312-a (WP 028647182)                                              | 94  |   | R | V | E | I  | P  | G | V | P | A | E  | T | P | L |
| <i>Amycolatopsis mediterranei</i> RB-b (AGT87403)                                           | 111 |   | G | I | V | L  | A  | G | E | T | E | V  | A | P | E |
| <i>Actinoplanes</i> sp. N902-109-b (AGL16703)                                               | 110 |   | A | I | V | P  | A  | G | Q | D | E | P  | A | A |   |
| <i>Nocardopsis</i> sp. CNT312-b (WP 028647186)                                              | 111 |   | G | V | A | R  | S  | G | E | S | P | A  | E | E | Y |
| <i>Amycolatopsis rifamycinica</i> -b (KDN18889)                                             | 111 |   | G | V | L | Y  | D  | G | E | T | T | V  | P | A | E |
| <i>Actinoplanes</i> sp. N902-109-c (AGL16704)                                               | 116 |   | G | I | V | R  | P  | G | G | H | E | V  | A | P | A |
| <i>Nocardopsis</i> sp. CNT312-d (WP 051415462)                                              | 128 |   | G | I | V | M  | P  | G | E | D | A | V  | A | P | E |
| <i>Salinispora pacifica</i> (CyaJ) (AGO97200)                                               | 119 |   | G | I | R | L  | P  | G | E | T | T | X  | R | E | Q |
| <i>Streptomyces</i> sp. CNT-179 (CynJ) (AGO97162)                                           | 115 |   | G | I | L | D  | G  | E | S | E | I | A  | P | E | R |
| <i>Amycolatopsis mediterranei</i> RB-c (AGT87405)                                           | 116 |   | G | I | L | D  | G  | E | S | E | I | A  | P | E | R |
| <i>Amycolatopsis rifamycinica</i> -c (KDN18887)                                             | 117 |   | G | I | L | A  | P  | G | E | S | E | I  | A | P | E |
| <i>Catenulispora acidiphila</i> (ACU15234)                                                  | 97  |   | G | V | M | A  | P  | G | E | T | E | V  | A | P | E |
| <i>Streptomyces carzinostaticus</i> subsp. <i>neocarzinostaticus</i> (Ncs-Orf16) (AAM77985) | 103 |   | G | V | M | A  | P  | G | E | H | S | V  | A | P | D |
| <i>Actinomadura flavaiba</i> (WP 018657673)                                                 | 97  |   | G | V | L | L  | P  | G | E | T | E | V  | S | A | P |
| <i>Actinomadura oligospora</i> (WP 026413625)                                               | 90  |   | G | V | V | A  | A  | G | A | K | E | P  | S | A | E |



**Figure S3.** Construction and confirmation of the  $\Delta$ *sgcJ* mutant strain *S. globisporus* SB1027. (a) Construction of the  $\Delta$ *sgcJ* mutant strain *S. globisporus* SB1027. S, *StuI*; Kan<sup>R</sup>, kanamycin resistant; Kan<sup>S</sup>, kanamycin sensitive, Thi<sup>R</sup>, thiostrepton resistant; Thi<sup>S</sup>, thiostrepton sensitive. (b) Southern analysis confirming the genotype of SB1027. M, DNA ladder; lane 1, SB1027; lane 2, SB1022.

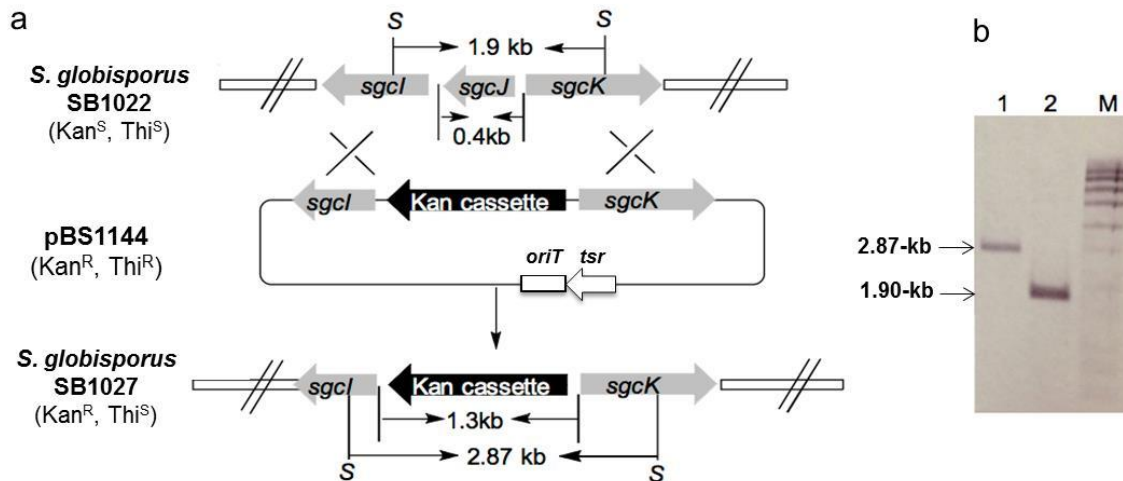

**Figure S4.** Molecular weight estimation of SgcJ and NCS-Orf16 in solution by size exclusion chromatography. (a) SgcJ and (b) NCS-Orf16 estimated on a Superdex 200 16/600 column calibrated against molecular weight standards. The apparent molecule weights of SgcJ and NCS-Orf16 were estimated to be 32.4 kDa and 37.3 kDa, suggesting that both SgcJ (calculated molecular weight of 14.6 KDa) and NCS-Orf16 (calculated molecular weight of 15.3 KDa) are dimers.

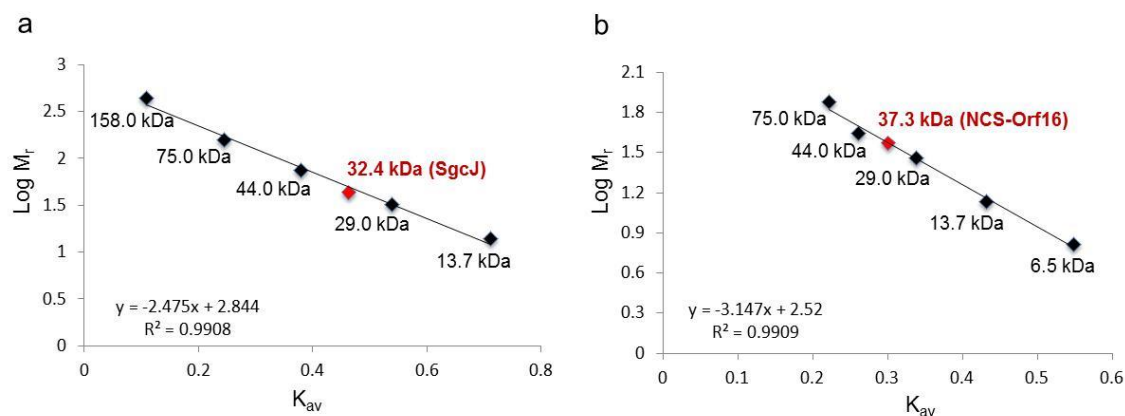

## References

- 1 Chen, Y., Yin, M., Horsman, G. P. & Shen, B. Improvement of the enediyne antitumor antibiotic C-1027 production by manipulating its biosynthetic pathway regulation in *Streptomyces globisporus*. *J. Nat. Prod.* **74**, 420-424 (2011).
- 2 Elespuru, R. K. & White, R. J. Biochemical prophage induction assay: a rapid test for antitumor agents that interact with DNA. *Cancer Res.* **43**, 2819-2830 (1983).
- 3 Doumith, M. *et al.* Analysis of genes involved in 6-deoxyhexose biosynthesis and transfer in *Saccharopolyspora erythraea*. *Mol. Gen. Genet.* **264**, 477-485 (2000).
- 4 Liu, W. & Shen, B. Genes for production of the enediyne antitumor antibiotic C-1027 in *Streptomyces globisporus* are clustered with the *cagA* gene that encodes the C-1027 apoprotein. *Antimicrob. Agents Chemother.* **44**, 382-392 (2000).
- 5 Liu, W. *et al.* The neocarzinostatin biosynthetic gene cluster from *Streptomyces carzinostaticus* ATCC 15944 involving two iterative type I polyketide synthases. *Chem. Biol.* **12**, 293-302 (2005).
- 6 Eschenfeldt, W. H., Lucy, S., Millard, C. S., Joachimiak, A. & Mark, I. D. A family of LIC vectors for high-throughput cloning and purification of proteins. *Methods Mol. Biol.* **498**, 105-115 (2009).
